# Supplementary material
Source: PubMed Central journal article supplement (PMC6895742)
Supplement: mmc1.pdf [file mmc1.pdf]

**Biophysical Journal, Volume 117**

**Supplemental Information**

**How Heterogeneity in Glucokinase and Gap-Junction Coupling Determines the Islet  $[Ca^{2+}]$  Response**

**JaeAnn M. Dwulet, Nurin W.F. Ludin, Robert A. Piscopio, Wolfgang E. Schleicher, Ong Moua, Matthew J. Westacott, and Richard K.P. Benninger**

**Figure S1: Experimentally demonstrating how heterogeneity in GK activity impact blood glucose and plasma insulin release via gap junction electrical coupling.**

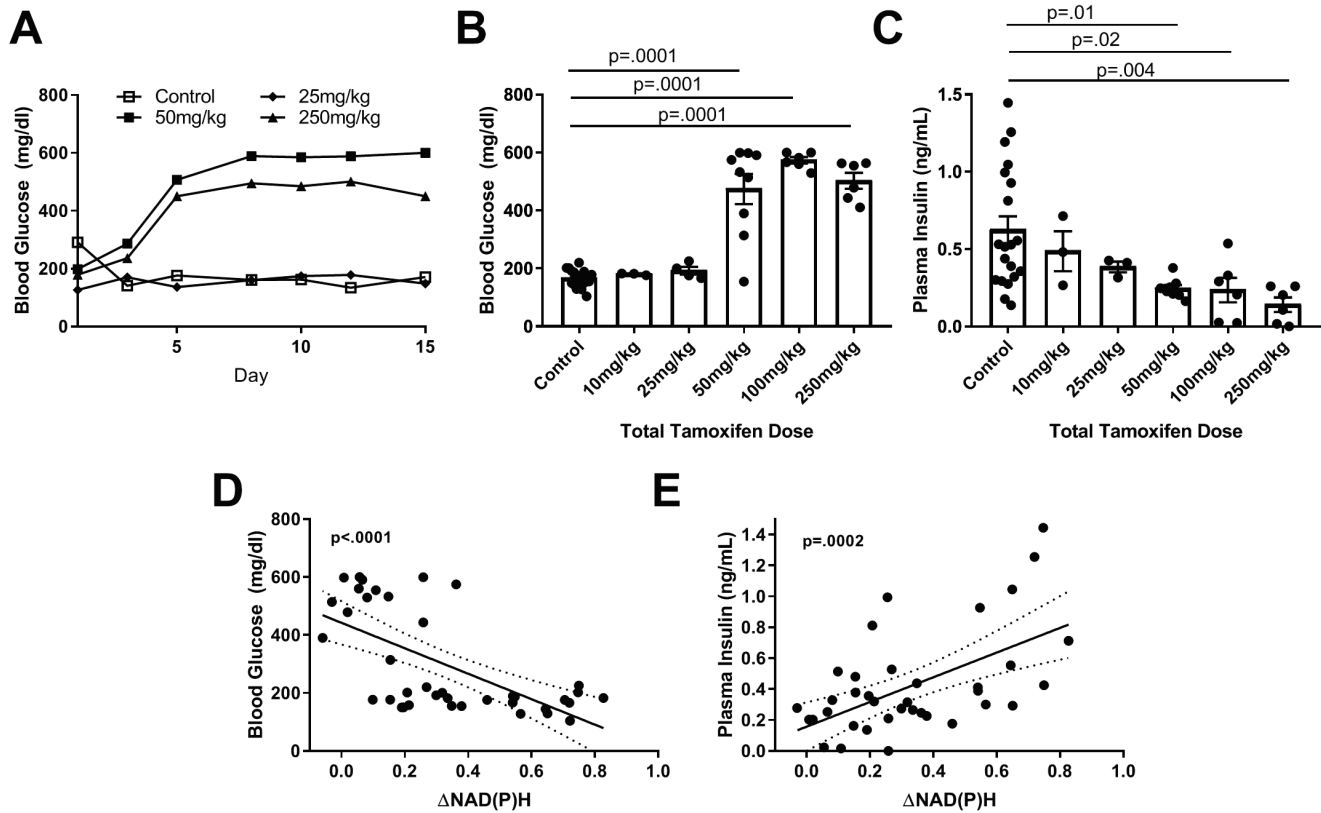

A). Representative time courses for blood glucose measurements for control and 3 tamoxifen doses used for mice with  $Cx36^{+/+}$ . B). Final blood glucose measurements before isolation vs. tamoxifen dose. C). Plasma insulin on day of isolation vs. tamoxifen dose. D). Linear regression of blood glucose vs. change in NAD(P)H (solid line) with 95% CI (dashed). E). Linear regression line of mice plasma insulin values vs. change in NAD(P)H, as in D. For blood glucose: for control  $n=19$ , for 10mg/kg  $n=3$ , for 25 mg/kg  $n=4$ , for 50mg/kg  $n=9$ , for 100mg/kg  $n=6$ , for 250mg/kg  $n=6$ . For plasma insulin control  $n=20$ , for 10mg/kg  $n=3$ , for 25 mg/kg  $n=3$ , for 50mg/kg  $n=8$ , for 100mg/kg  $n=6$ , for 250mg/kg  $n=6$ . For  $\Delta$ NADH regression,  $n=39$  for blood glucose and  $n=38$  for plasma insulin.

**Figure S2: Simulations predicting how heterogeneity in metabolic activity, with uniform  $K_{ATP}$  activity, impacts islet function.**

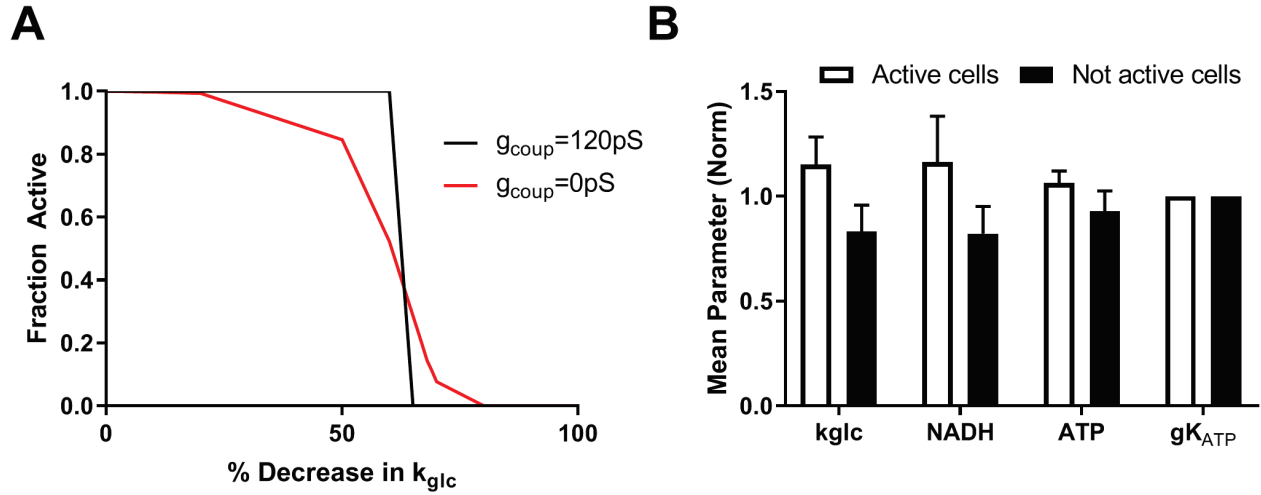

A). Fraction of cells showing elevated  $[Ca^{2+}]$  activity ('active cells') in a representative simulated islet that excludes heterogeneity in  $g_{K_{ATP}}$ , vs. fractional decrease in  $k_{glc}$  (decreasing GK activity) for  $g_{coup} = 120\text{pS}$  and  $0\text{pS}$ . B). Average parameter values in  $[Ca^{2+}]$  active cells and non-active cells within a simulated islet with  $g_{coup}=0\text{pS}$  and 60% decrease in  $k_{glc}$ . Data in B. represents mean  $\pm$  SD across all active or inactive cells.

**Figure S3: Simulations predicting how other factors underlying GK kinetics impact islet function.**

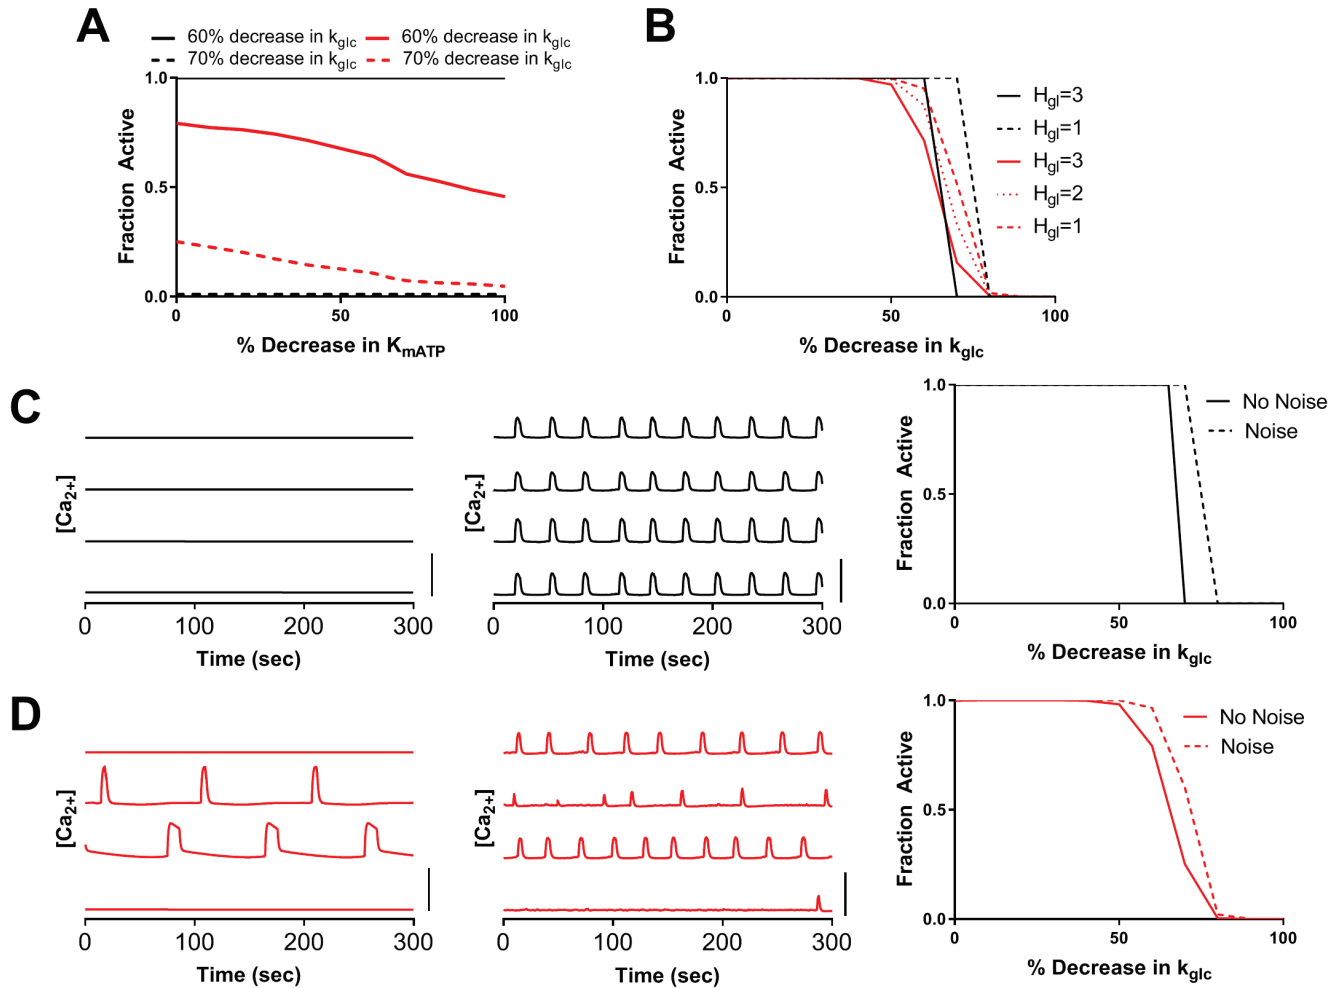

A). Fraction of active cells vs. decreases in the half maximal concentration of ATP ( $K_{mATP}$ ), with  $g_{coup}=120pS$  (black) and  $g_{coup}=0pS$  (red), each for two different values of  $k_{glc}$  (higher  $k_{glc}$  solid, lower  $k_{glc}$  dashed). B). Fraction of active cells for several different hill coefficients for the glucose dependence of GK activity, with  $g_{coup}=120pS$  and  $g_{coup}=0pS$ . C). [ $Ca^{2+}$ ] activity with and without stochastic noise present in the model. Left: Representative time courses for 4 individual cells with  $g_{coup}=120pS$  without stochastic noise at 70% decrease in  $k_{glc}$ . Middle: Representative time courses for 4 individual cells in simulations with stochastic noise at 65% decrease in  $k_{glc}$ . Right: Fraction of active cells for simulations with and without noise vs. % decrease in  $k_{glc}$ . D). As in C. but for simulations with  $g_{coup}=0pS$ . Scale bar in C,D represents  $0.5\mu M$ .

Figure S4: All simulation data from MODY-2 mutations.

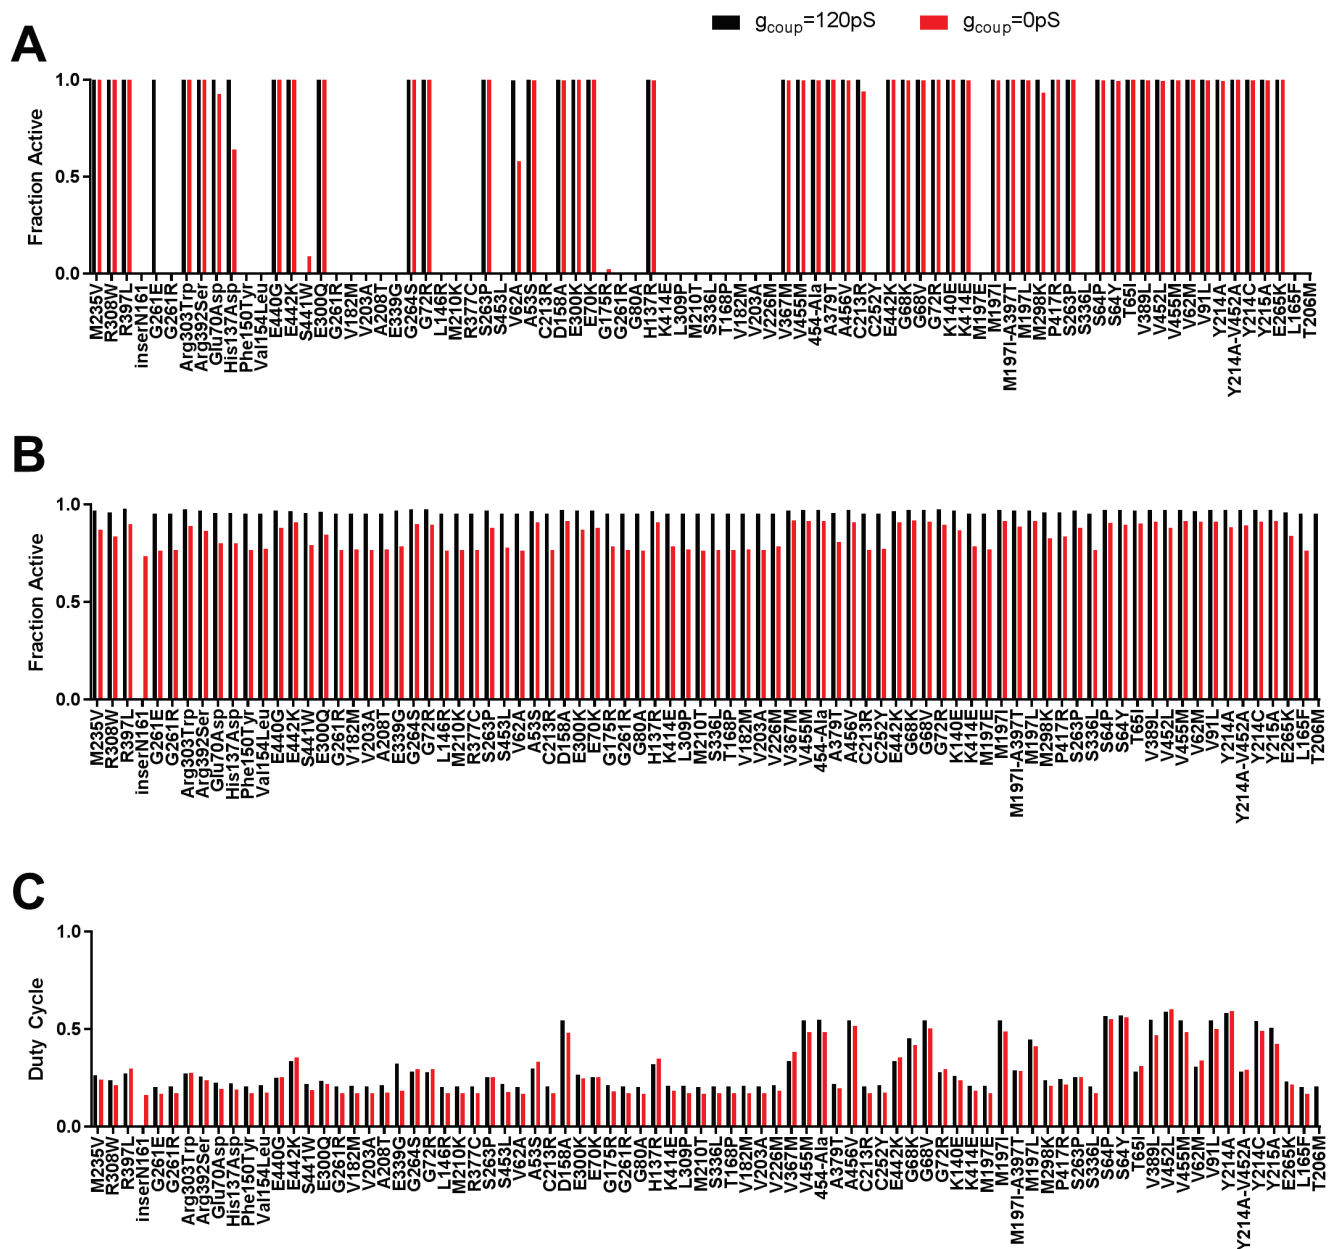

A). Fraction of active cells from all MODY-2 mutations used with homozygous GK activity at 20mM glucose. B). Fraction of active cells from all MODY-2 mutations used with heterozygous GK activity at 11mM glucose. C). Average duty cycle for all MODY-2 mutations used with heterozygous GK activity at 11mM glucose. Black bars are simulations with  $g_{\text{coup}} = 120\text{pS}$  and red bars are  $g_{\text{coup}} = 0\text{pS}$ ,  $n=82$  simulations.

**Figure S5: Simulations predicting how heterozygous expression of human MODY-2 GK impacts islet function.**

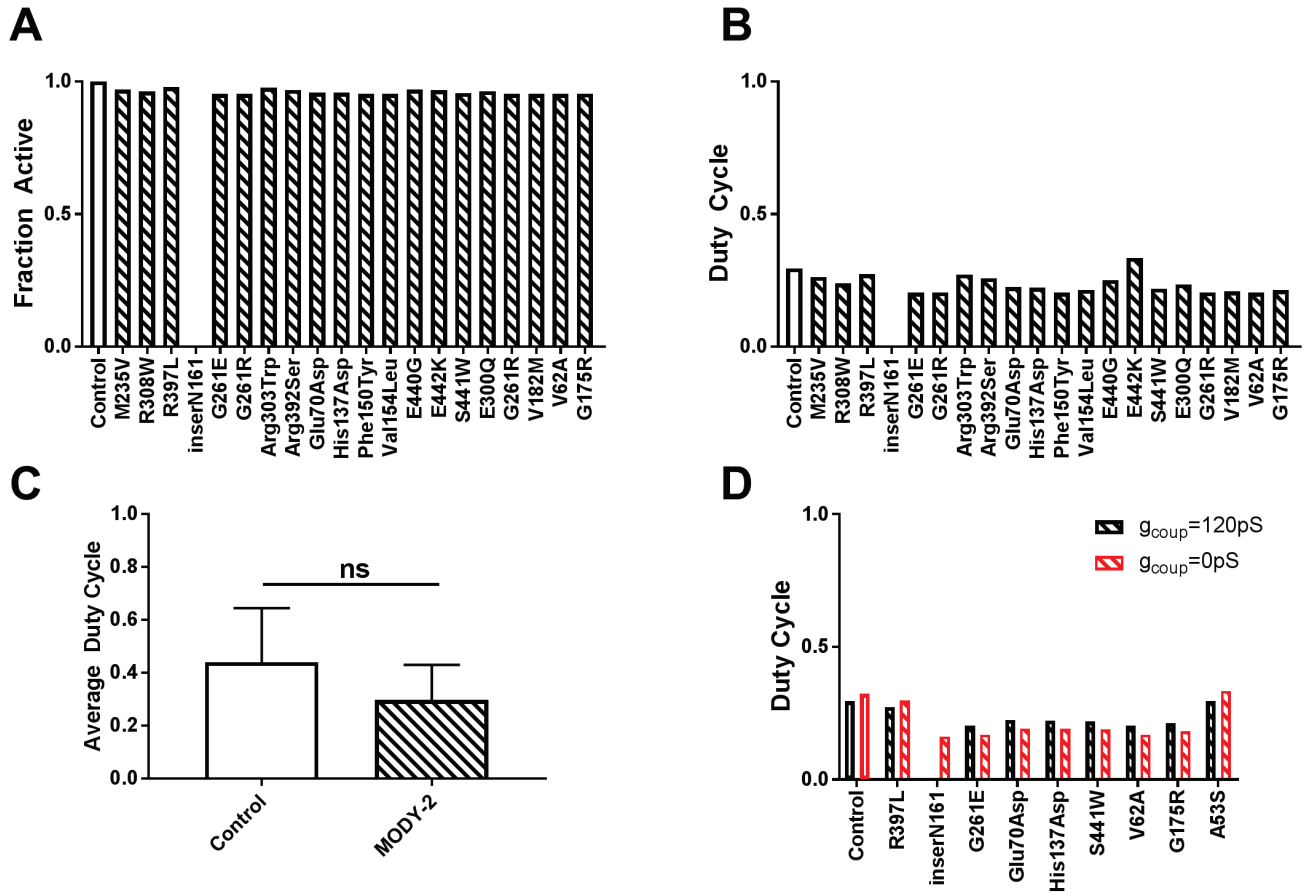

A). Fraction of active cells for representative simulations of human MODY-2 mutations that were simulated as heterozygous GK activity (See Methods) at 11mM glucose. Mutations are those representative ones presented in Figure 6b. B). Duty cycle for heterozygous mutations for MODY-2 compared with control simulation (as in A and in Figure 6b) at 11mM glucose. C). Average duty cycle for all mutations (n=82) and all control simulations (n=2) at 11mM glucose. D). Representative results for duty cycle from heterozygous simulations for  $g_{coup}=120pS$  and  $g_{coup}=0pS$ . Mutations are those representative ones presented in Figure 6g. Data in C,D presented as mean $\pm$ SD.

**Figure S6: Simulations categorized by HbA1c severity.**

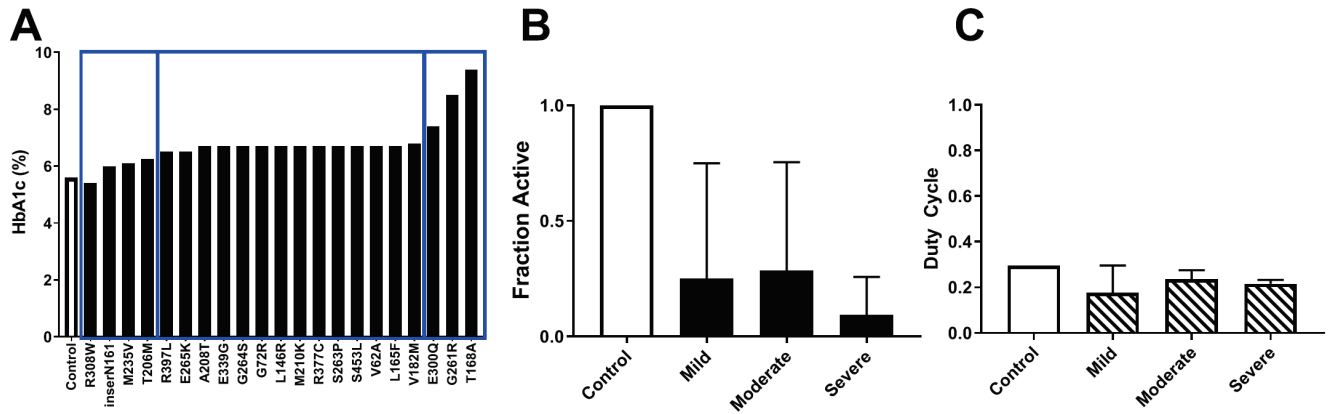

A). HbA1c with bins chosen (blue rectangles) for mild, moderate, and severe mutations, ordered from left to right. B). Mean fraction of active cells from simulations of mutations in A. at 11mM glucose, averaging over the disease severity and considering homozygous mutations. C). Average duty cycle for mutations in A at 11mM glucose averaging over the disease severity and considering heterozygous mutations. All simulations run with  $g_{\text{coup}}=120\text{pS}$ . Data in B and C represent mean $\pm$ SD.

**Figure S7: Summarizing computational and experimental results in the presence of GK heterogeneity.**

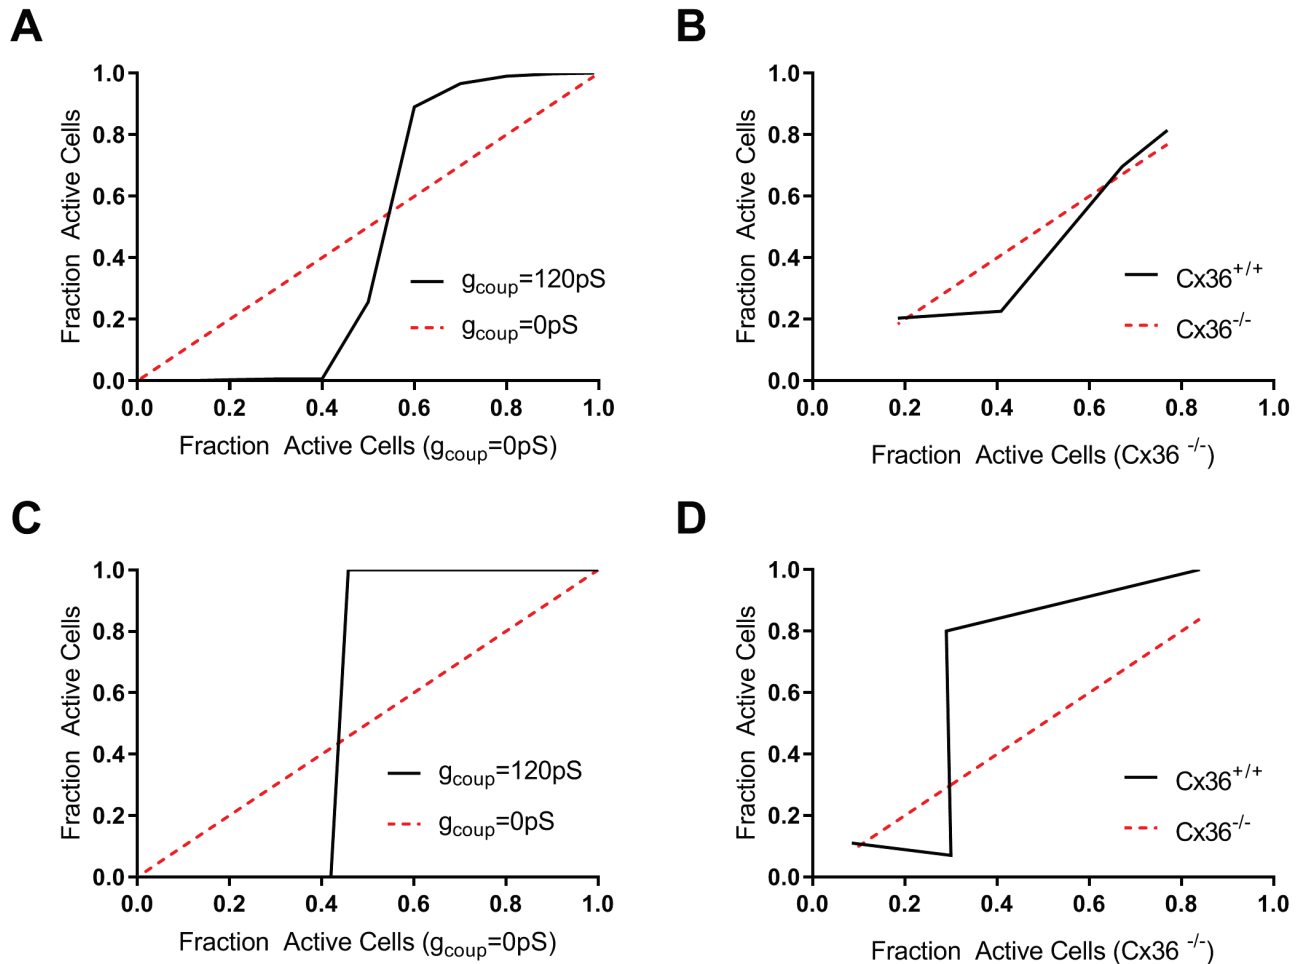

A). Simulations demonstrating the transition from islet-wide elevated  $[Ca^{2+}]$  to complete suppression in islets with varying proportion of cells that are unable to respond to  $[Ca^{2+}]$ , in this case because of deficiency in GK (GK-). Plotted is data from figure 1 with defined populations of GK deficient cells, displaying the proportion of cells showing elevated  $[Ca^{2+}]$  in the absence of gap junction electrical coupling against in the presence of gap junction electrical coupling. B) As in A for experimental measurements plotting data from figure 2 with defined populations of GK deficient cells. C) As in A for simulations plotting data from figure 3 with continuous distribution of GK activity. D) As in A for experimental measurements plotting data from figure 4 with the endogenous distribution of GK activity. For islets with zero gap junction electrical coupling the transition is trivially linear (red dashed).



**Table S1: List of GCK mutations simulated in this study.**

| <b>PNDM GCK mutations</b> |          |             |        |             |                 |              |           |          |
|---------------------------|----------|-------------|--------|-------------|-----------------|--------------|-----------|----------|
| Number                    | Mutation | k_glc (s-1) | K_G mM | Km_ATP (mM) | Hill (unitless) | OGTT (mg/dl) | HbA1c (%) | Citation |
| 1                         | A378V    | 55.4        | 576    | 9.92        | 0.94            |              |           | 55       |
| 2                         | G264S    | 63.5        | 9.76   | 0.48        | 1.57            |              |           | 55       |
|                           | Control  | 64.2        | 7.56   | 0.37        | 1.77            |              |           | 55       |
| 3                         | T168A    | 5.33        | 25.47  | 7.89        | 0.86            |              |           | 52       |
|                           | Control  | 61.52       | 7.39   | 0.64        | 1.58            |              |           | 53       |
| 4                         | M210K    | 16.7        | 38.7   | 1.38        | 1.63            |              |           | 36       |
| 5                         | T228M    | 0.004       | 5.5    | 0.62        | 0.71            |              |           | 36       |
|                           | Control  | 52.4        | 7.7    | 0.35        | 1.66            |              |           | 36       |

| <b>MODY-2 GCK mutations</b> |           |             |        |             |                 |              |           |          |
|-----------------------------|-----------|-------------|--------|-------------|-----------------|--------------|-----------|----------|
| Number                      | Mutation  | k_glc (s-1) | K_G mM | Km_ATP (mM) | Hill (unitless) | OGTT (mg/dl) | HbA1c (%) | Citation |
| 1                           | M235V     | 22.9        | 7.8    | 0.46        | 1.38            | 147.6        | 6.1       | 51       |
| 2                           | R308W     | 22.3        | 10.7   | 0.5         | 1.36            | 226.8        | 5.4       | 51       |
| 3                           | R397L     | 42.1        | 7.7    | 0.46        | 1.5             | 154.8        | 6.5       | 51       |
| 4                           | inserN161 | 0.29        | 155    | 0.32        | 0.99            | 198          | 6         | 51       |
|                             | Control   | 55.5        | 7.6    | 0.49        | 1.42            |              |           | 51       |
| 5                           | G261E     | 3.72        | 334.73 | 2.99        | 1.92            |              |           | 50       |
| 6                           | G261R     | 17.03       | 68.61  | 0.63        | 1.53            |              |           | 50       |
|                             | Control   | 62.3        | 7.55   | 0.41        | 1.74            |              |           | 50       |
| 7                           | Arg303Trp | 14.6        | 4.62   | 0.29        | 1.52            |              |           | 49       |
| 8                           | Arg392Ser | 41.3        | 11.9   | 0.63        | 1.3             |              |           | 49       |
| 9                           | Glu70Asp  | 27.4        | 20.1   | 0.25        | 1.2             |              |           | 49       |
| 10                          | His137Asp | 17.2        | 18.1   | 0.23        | 1.1             |              |           | 49       |
| 11                          | Phe150Tyr | 9.92        | 101.4  | 3.11        | 1.06            |              |           | 49       |
| 12                          | Val154Leu | 46.6        | 26     | 1.62        | 1.54            |              |           | 49       |
|                             | Control   | 44.1        | 7.2    | 0.4         | 1.4             |              |           | 49       |
| 13                          | E440G     | 51.55       | 10.85  | 0.74        | 1.52            | 108.9        | N/A       | 48       |
| 14                          | E442K     | 41.98       | 4.43   | 0.72        | 1.6             | N/A          | N/A       | 48       |
| 15                          | S441W     | 20.72       | 15.89  | 1.12        | 1.38            | 144.9        | N/A       | 48       |
|                             | Control   | 65.57       | 7.97   | 0.45        | 1.71            |              |           | 48       |
| 16                          | E300Q     | 100         | 20     |             |                 | 122.4        | 7.4       | 56       |
| 17                          | G261R     | 0.46        | 2.5    |             |                 | 207          | 8.5       | 56       |
| 18                          | V182M     | 49          | 70     |             |                 | 223.2        | 6.8       | 56       |
| 19                          | V203A     | 0.5         | 100    |             |                 | 102.6        | N/A       | 56       |
|                             | Control   | 100         | 8      |             |                 | 95.4         | N/A       | 56       |
| 20                          | A208T     | 4.41        | 10.1   | 2.61        | 1.23            | 171*         | 6.7*      | 47       |
| 21                          | E339G     | 60.2        | 32.1   | 1.87        | 1.34            | 171*         | 6.7*      | 47       |
| 22                          | G264S     | 65.3        | 9.76   | 0.48        | 1.57            | 171*         | 6.7*      | 47       |
| 23                          | G72R      | 33.5        | 5.32   | 0.76        | 1.45            | 171*         | 6.7*      | 47       |
| 24                          | L146R     | 0.21        | 123    | 0.1         | 0.95            | 171*         | 6.7*      | 47       |
| 25                          | M210K     | 26.7        | 52.8   | 1.58        | 1.64            | 171*         | 6.7*      | 47       |
| 26                          | R377C     | 5.92        | 52.3   | 0.28        | 1.64            | 171*         | 6.7*      | 47       |
| 27                          | S263P     | 64.7        | 12.2   | 0.51        | 1.59            | 171*         | 6.7*      | 47       |
| 28                          | S453L     | 8.89        | 16     | 0.69        | 1.39            | 171*         | 6.7*      | 47       |
| 29                          | V62A      | 39          | 24.6   | 0.2         | 1.5             | 171*         | 6.7*      | 47       |
|                             | Control   | 63          | 7.55   | 1.74        | 0.41            | 91.8         | 5.6       | 47       |
| 30                          | A53S      | 45.2        | 8.1    | 0.22        | 1.8             |              |           | 45       |
| 31                          | C213R     | 14.1        | 58.4   | 0.85        | 1.76            |              |           | 45       |
| 32                          | D158A     | 52.2        | 3.67   | 0.33        | 1.7             |              |           | 45       |
| 33                          | E300K     | 33.8        | 10.3   | 0.46        | 1.85            |              |           | 45       |
| 34                          | E70K      | 43.2        | 11.5   | 0.36        | 1.78            |              |           | 45       |
| 35                          | G175R     | 17.1        | 19.6   | 0.45        | 1.74            |              |           | 45       |

|    |             |      |      |      |      |       |      |    |
|----|-------------|------|------|------|------|-------|------|----|
| 36 | G261R       | 1.04 | 118  | 3.83 | 2.2  |       |      | 45 |
| 37 | G80A        | 0.06 | 965  | 7.71 | 0.64 |       |      | 45 |
| 38 | H137R       | 44.7 | 7.46 | 0.24 | 1.8  |       |      | 45 |
| 39 | K414E       | 11   | 12.3 | 1.73 | 1.67 |       |      | 45 |
| 40 | L309P       | 1.1  | 9.46 | 0.58 | 1.92 |       |      | 45 |
| 41 | M210T       | 6.22 | 234  | 5.68 | 1.36 |       |      | 45 |
| 42 | S336L       | 1.03 | 5.42 | 21.7 | 1.13 |       |      | 45 |
| 43 | T168P       | 0.35 | 160  | 9.33 | 0.92 |       |      | 45 |
| 44 | V182M       | 12.2 | 34.9 | 0.11 | 1.7  |       |      | 45 |
| 45 | V203A       | 12.3 | 58.4 | 0.88 | 1.53 |       |      | 45 |
| 46 | V226M       | 42.7 | 17.9 | 5.74 | 1.41 |       |      | 45 |
| 47 | V367M       | 58.1 | 7.56 | 0.31 | 1.8  |       |      | 45 |
| 48 | V455M       | 48.6 | 3.18 | 0.25 | 1.66 |       |      | 45 |
|    | Control     | 51.5 | 8.33 | 0.31 | 1.8  |       |      | 45 |
| 49 | 454-Ala     | 52.2 | 1.38 | 0.31 | 1.62 |       |      | 57 |
| 50 | A379T       | 61.2 | 12.3 | 0.87 | 1.6  |       |      | 57 |
| 51 | A456V       | 65.6 | 1.91 | 0.35 | 1.37 |       |      | 57 |
| 52 | C213R       | 50   | 21.6 | 0.89 | 1.43 |       |      | 57 |
| 53 | C252Y       | 29.3 | 31.6 | 0.75 | 1.54 |       |      | 57 |
| 54 | E442K       | 52.6 | 5.24 | 1.5  | 1.72 |       |      | 57 |
| 55 | G68K        | 43.2 | 2.34 | 0.39 | 1.33 |       |      | 57 |
| 56 | G68V        | 62.7 | 2.2  | 0.31 | 1.35 |       |      | 57 |
| 57 | G72R        | 29.8 | 7.38 | 0.72 | 1.42 |       |      | 57 |
| 58 | K140E       | 40   | 10.8 | 0.35 | 1.57 |       |      | 57 |
| 59 | K414E       | 19.9 | 5.69 | 1.53 | 1.52 |       |      | 57 |
| 60 | M197E       | 17.7 | 41.6 | 0.4  | 1.4  |       |      | 57 |
| 61 | M197I       | 58.1 | 2.49 | 1.39 | 1.8  |       |      | 57 |
| 62 | M197I-A397T | 50.2 | 5.81 | 2.71 | 1.36 |       |      | 57 |
| 63 | M197L       | 62.6 | 4.03 | 1.31 | 1.6  |       |      | 57 |
| 64 | M298K       | 37.7 | 10.8 | 3.32 | 1.28 |       |      | 57 |
| 65 | P417R       | 48.3 | 6.59 | 2.08 | 1.52 |       |      | 57 |
| 66 | S263P       | 44.6 | 9.7  | 0.63 | 1.66 |       |      | 57 |
| 67 | S336L       | 2.46 | 4.75 | 12.6 | 0.95 |       |      | 57 |
| 68 | S64P        | 83.3 | 2.07 | 0.32 | 1.31 |       |      | 57 |
| 69 | S64Y        | 114  | 1.89 | 1.59 | 1.5  |       |      | 57 |
| 70 | T65I        | 22.6 | 1.69 | 0.57 | 1.3  |       |      | 57 |
| 71 | V389L       | 67.1 | 3.45 | 0.76 | 1.54 |       |      | 57 |
| 72 | V452L       | 122  | 2.27 | 0.53 | 1.46 |       |      | 57 |
| 73 | V455M       | 61.8 | 3.24 | 0.38 | 1.62 |       |      | 57 |
| 74 | V62M        | 47.2 | 5.9  | 0.52 | 1.38 |       |      | 57 |
| 75 | V91L        | 60.6 | 1.66 | 0.48 | 1.42 |       |      | 57 |
| 76 | Y214A       | 117  | 1.41 | 0.92 | 1.41 |       |      | 57 |
| 77 | Y214A-V452A | 23.1 | 0.55 | 1.42 | 0.88 |       |      | 57 |
| 78 | Y214C       | 65.3 | 1.35 | 1.08 | 1.55 |       |      | 57 |
| 79 | Y215A       | 44.7 | 2.07 | 0.58 | 1.46 |       |      | 57 |
|    | Control     | 62.8 | 7.45 | 0.46 | 1.77 |       |      | 57 |
| 80 | E265K       | 36.8 | 15.5 | 0.63 | 1.43 | N/A   | 6.5  | 58 |
| 81 | L165F       | 18   | 92.5 | 1.52 | 1.21 | 205.2 | 6.7  | 58 |
| 82 | T206M       | 0.18 | 85   | 0.45 | 0.9  | 167.4 | 6.25 | 58 |
|    | Control     | 42   | 8    | 0.4  | 1.53 |       |      | 58 |

Mutations separated by PNDM and MODY2. Number represents order of appearance in Figure 6 or S4 Figure. Control represents wild-type GK. N/A indicates data not available. \* indicates average value in cited study (individuals not presented).

**File S1: Model code used in this study.**

(see accompanying zip file)
